# Supplementary material for: Long-term prognostic factors of chronic central serous chorioretinopathy after half-dose photodynamic therapy: A 3-year follow-up study
Source: PubMed Central journal article supplement (PMC5524407; doi:10.1371/journal.pone.0181479), 2017-07-24
Supplement: pone.0181479.s001.pdf [file pone.0181479.s001.pdf]

|                       | previous or concurrent use of corticosteroids | History of smoking | Refractive error (SE, diopters) | BCVA at baseline (logMAR) | BCVA 3 years after PDT (logMAR) | Central foveal thickness (µm) | Neuroretinal thickness (µm) | Subretinal fluid height (µm) | Subfoveal choroidal thickness (µm) | PDT spot area (mm <sup>2</sup> ) | Window defect area (mm <sup>2</sup> ) |
|-----------------------|-----------------------------------------------|--------------------|---------------------------------|---------------------------|---------------------------------|-------------------------------|-----------------------------|------------------------------|------------------------------------|----------------------------------|---------------------------------------|
| Unsuccessful group 1  | No                                            | No                 | -1.500                          | 0.30103                   | 0.22185                         | 317.0                         | 217.5                       | 99.5                         | 442.5                              | 15.9                             | 2.7                                   |
| Unsuccessful group 2  | No                                            | Yes                | -1.125                          | 0.22185                   | 0.00000                         | 213.0                         | 162.5                       | 50.5                         | 178.0                              | 4.3                              | 1.1                                   |
| Unsuccessful group 3  | No                                            | No                 | -0.250                          | 0.22185                   | 0.09691                         | 449.0                         | 209.5                       | 239.5                        | 512.5                              | 6.8                              | 5.7                                   |
| Unsuccessful group 4  | No                                            | Yes                | -0.625                          | 0.22185                   | 0.00000                         | 242.5                         | 178.0                       | 64.5                         | 380.5                              | 3.6                              | 1.7                                   |
| Unsuccessful group 5  | No                                            | No                 | -0.125                          | 0.79588                   | 0.30103                         | 197.5                         | 112.0                       | 25.0                         | 458.0                              | 7.8                              | 6.2                                   |
| Unsuccessful group 6  | No                                            | No                 | 1.875                           | 0.30103                   | 0.22185                         | 243.0                         | 160.0                       | 83.0                         | 358.0                              | 36.0                             | 20.5                                  |
| Unsuccessful group 7  | No                                            | No                 | -1.125                          | 0.22185                   | 0.09691                         | 226.0                         | 142.0                       | 84.0                         | 443.0                              | 4.0                              | 0.1                                   |
| Unsuccessful group 8  | No                                            | Yes                | -2.125                          | 1.00000                   | 0.69897                         | 259.5                         | 122.0                       | 137.5                        | 397.5                              | 13.2                             | 4.1                                   |
| Unsuccessful group 9  | No                                            | Yes                | 0.750                           | 0.22185                   | 0.00000                         | 437.0                         | 130.0                       | 307.0                        | 496.0                              | 13.8                             | 15.9                                  |
| Unsuccessful group 10 | Yes                                           | No                 | -0.125                          | 0.22185                   | 0.00000                         | 184.0                         | 184.0                       | 0.0                          | 273.5                              | 5.7                              | 4.8                                   |
| Unsuccessful group 11 | Yes                                           | Yes                | 0.250                           | 0.30103                   | 0.09691                         | 233.0                         | 172.5                       | 60.5                         | 295.5                              | 12.6                             | 4.4                                   |
| Unsuccessful group 12 | Yes                                           | Yes                | 0.500                           | 0.09691                   | 0.09691                         | 470.5                         | 188.0                       | 282.5                        | 289.0                              | 17.3                             | 1.8                                   |
| Unsuccessful group 13 | No                                            | No                 | 4.000                           | 0.22185                   | 0.09691                         | 520.0                         | 150.5                       | 369.5                        | 440.0                              | 17.3                             | 24.6                                  |
| Unsuccessful group 14 | Yes                                           | No                 | -4.375                          | 0.09691                   | -0.11394                        | 252.0                         | 165.5                       | 81.5                         | 272.0                              | 11.9                             | 0.2                                   |
| Unsuccessful group 15 | No                                            | Yes                | -2.875                          | 0.39794                   | 0.39794                         | 240.0                         | 204.0                       | 36.0                         | 260.0                              | 3.3                              | 0.3                                   |
| Successful group 1    | No                                            | No                 | 0.500                           | 0.00000                   | -0.11394                        | 364.0                         | 184.0                       | 180.0                        | 419.5                              | 8.0                              | 0.3                                   |
| Successful group 2    | No                                            | No                 | -0.500                          | 0.22185                   | 0.00000                         | 320.0                         | 173.0                       | 147.0                        | 440.0                              | 20.4                             | 3.5                                   |
| Successful group 3    | No                                            | Yes                | -4.750                          | 0.09691                   | 0.00000                         | 242.0                         | 191.5                       | 50.5                         | 422.0                              | 5.5                              | 2.7                                   |
| Successful group 4    | No                                            | Yes                | 0.875                           | 0.09691                   | 0.00000                         | 375.5                         | 148.5                       | 227.0                        | 503.0                              | 8.8                              | 3.0                                   |
| Successful group 5    | No                                            | Yes                | 0.750                           | 0.09691                   | 0.00000                         | 255.0                         | 151.5                       | 103.5                        | 592.0                              | 13.9                             | 32.6                                  |
| Successful group 6    | No                                            | No                 | 0.500                           | 0.00000                   | -0.11394                        | 500.5                         | 199.5                       | 301.0                        | 418.5                              | 4.7                              | 1.0                                   |
| Successful group 7    | Yes                                           | Yes                | -0.250                          | 0.00000                   | 0.09691                         | 307.0                         | 198.5                       | 108.5                        | 404.5                              | 19.4                             | 4.5                                   |
| Successful group 8    | No                                            | No                 | -0.250                          | 0.00000                   | 0.00000                         | 466.5                         | 189.5                       | 277.0                        | 358.0                              | 6.4                              | 2.7                                   |
| Successful group 9    | No                                            | Yes                | 2.500                           | 0.22185                   | 0.00000                         | 347.0                         | 147.0                       | 200.0                        | 475.0                              | 8.0                              | 4.7                                   |
| Successful group 10   | No                                            | No                 | -1.250                          | -0.11394                  | 0.00000                         | 235.0                         | 235.0                       | 0.0                          | 561.0                              | 26.4                             | 11.4                                  |
| Successful group 11   | No                                            | Yes                | -0.250                          | -0.07918                  | -0.11394                        | 287.5                         | 219.5                       | 68.0                         | 514.0                              | 7.2                              | 0.7                                   |
| Successful group 12   | Yes                                           | Yes                | -1.125                          | 0.22185                   | -0.11394                        | 308.0                         | 196.5                       | 111.5                        | 396.5                              | 8.0                              | 2.6                                   |
| Successful group 13   | No                                            | Yes                | 2.000                           | 0.22185                   | 0.09691                         | 562.0                         | 196.0                       | 366.0                        | 331.0                              | 4.7                              | 0.9                                   |
| Successful group 14   | No                                            | Yes                | 0.625                           | 0.30103                   | 0.22185                         | 179.5                         | 122.0                       | 8.0                          | 427.0                              | 8.6                              | 7.1                                   |
| Successful group 15   | No                                            | Yes                | 0.750                           | 0.30103                   | -0.11394                        | 420.5                         | 175.5                       | 245.0                        | 506.5                              | 5.5                              | 0.6                                   |
| Successful group 16   | No                                            | No                 | -2.000                          | -0.11394                  | 0.00000                         | 347.0                         | 205.0                       | 142.0                        | 374.5                              | 4.3                              | 0.6                                   |
| Successful group 17   | No                                            | Yes                | -5.250                          | 0.30103                   | 0.09691                         | 218.5                         | 115.5                       | 103.0                        | 437.0                              | 17.4                             | 10.3                                  |
| Successful group 18   | No                                            | No                 | -0.500                          | 0.09691                   | -0.11394                        | 282.5                         | 143.5                       | 139.0                        | 545.0                              | 4.0                              | 4.2                                   |
| Successful group 19   | No                                            | Yes                | -0.125                          | 0.00000                   | -0.07918                        | 338.5                         | 209.5                       | 129.0                        | 354.5                              | 16.6                             | 3.2                                   |
| Successful group 20   | No                                            | Yes                | -1.750                          | 0.22185                   | 0.00000                         | 432.5                         | 219.0                       | 213.5                        | 250.0                              | 13.2                             | 2.1                                   |
| Successful group 21   | No                                            | Yes                | 0.500                           | 0.39794                   | 0.30103                         | 206.0                         | 121.0                       | 85.0                         | 296.5                              | 4.3                              | 0.2                                   |
| Successful group 22   | Yes                                           | Yes                | -1.375                          | 0.00000                   | 0.00000                         | 294.5                         | 162.0                       | 132.5                        | 454.5                              | 11.3                             | 2.1                                   |
| Successful group 23   | No                                            | Yes                | -0.125                          | 0.00000                   | -0.11394                        | 304.5                         | 185.5                       | 119.0                        | 298.0                              | 9.9                              | 9.7                                   |
| Successful group 24   | No                                            | Yes                | 0.125                           | 0.00000                   | 0.00000                         | 343.5                         | 224.5                       | 119.0                        | 399.5                              | 11.6                             | 5.7                                   |
| Successful group 25   | No                                            | Yes                | -0.375                          | -0.11394                  | 0.00000                         | 240.5                         | 240.5                       | 0.0                          | 647.5                              | 39.6                             | 6.0                                   |
| Successful group 26   | No                                            | Yes                | -1.000                          | 1.00000                   | 0.09691                         | 383.5                         | 213.0                       | 170.5                        | 853.0                              | 8.3                              | 0.4                                   |
| Successful group 27   | No                                            | Yes                | -0.375                          | 0.09691                   | 0.00000                         | 162.5                         | 125.0                       | 37.5                         | 396.5                              | 18.1                             | 16.4                                  |
| Successful group 28   | No                                            | Yes                | 0.000                           | 0.09691                   | -0.11394                        | 482.5                         | 200.5                       | 282.0                        | 804.5                              | 21.2                             | 6.3                                   |
| Successful group 29   | Yes                                           | Yes                | -3.000                          | 0.39794                   | 0.22185                         | 312.0                         | 159.0                       | 153.0                        | 303.5                              | 5.7                              | 3.0                                   |
| Successful group 30   | No                                            | Yes                | -0.500                          | 0.22185                   | 0.04576                         | 218.0                         | 123.5                       | 94.5                         | 263.5                              | 7.1                              | 0.1                                   |
| Successful group 31   | No                                            | Yes                | -0.500                          | 0.00000                   | -0.11394                        | 308.5                         | 193.5                       | 115.0                        | 525.5                              | 4.0                              | 3.2                                   |
| Successful group 32   | No                                            | Yes                | -0.625                          | 0.79588                   | 0.39794                         | 419.5                         | 140.0                       | 279.5                        | 430.5                              | 15.2                             | 3.9                                   |
| Successful group 33   | No                                            | Yes                | -5.000                          | 0.09691                   | 0.00000                         | 308.5                         | 223.0                       | 85.5                         | 498.0                              | 9.9                              | 0.5                                   |
| Successful group 34   | No                                            | No                 | 0.500                           | 0.39794                   | 0.22185                         | 294.5                         | 192.0                       | 102.5                        | 558.0                              | 7.8                              | 0.5                                   |
| Successful group 35   | No                                            | No                 | -0.375                          | 0.30103                   | 0.09691                         | 313.0                         | 170.0                       | 143.0                        | 421.5                              | 43.0                             | 12.3                                  |
| Successful group 36   | No                                            | Yes                | 4.000                           | 0.09691                   | 0.00000                         | 295.0                         | 204.0                       | 91.0                         | 400.5                              | 15.2                             | 9.4                                   |
| Successful group 37   | No                                            | Yes                | -0.375                          | 0.22185                   | 0.00000                         | 242.0                         | 166.5                       | 75.5                         | 214.5                              | 6.2                              | 3.4                                   |
| Successful group 38   | No                                            | No                 | 1.375                           | 0.22185                   | 0.00000                         | 302.5                         | 189.5                       | 113.0                        | 307.5                              | 7.1                              | 0.6                                   |
| Successful group 39   | No                                            | No                 | 0.250                           | 0.04576                   | 0.00000                         | 405.5                         | 333.0                       | 72.5                         | 382.5                              | 5.7                              | 2.5                                   |
| Successful group 40   | No                                            | Yes                | -0.500                          | 0.30103                   | 0.00000                         | 282.5                         | 171.5                       | 111.0                        | 388.5                              | 6.2                              | 1.7                                   |
| Successful group 41   | No                                            | No                 | 2.250                           | 0.09691                   | 0.00000                         | 449.5                         | 204.0                       | 245.5                        | 346.5                              | 6.8                              | 1.1                                   |
| Successful group 42   | No                                            | Yes                | -0.500                          | 0.09691                   | 0.09691                         | 268.5                         | 126.5                       | 142.0                        | 425.5                              | 16.6                             | 2.3                                   |
| Successful group 43   | No                                            | No                 | 0.000                           | 0.30103                   | 0.00000                         | 539.5                         | 178.5                       | 361.0                        | 222.0                              | 29.1                             | 15.7                                  |
| Successful group 44   | No                                            | Yes                | -0.625                          | 0.09691                   | 0.00000                         | 317.0                         | 188.0                       | 129.0                        | 501.0                              | 7.1                              | 2.3                                   |
| Successful group 45   | No                                            | Yes                | -1.250                          | 0.15490                   | 0.30103                         | 309.5                         | 128.0                       | 181.5                        | 366.5                              | 3.5                              | 6.3                                   |
| Successful group 46   | No                                            | Yes                | -1.125                          | 0.00000                   | -0.07918                        | 223.5                         | 184.5                       | 39.0                         | 295.5                              | 5.7                              | 2.2                                   |
| Successful group 47   | Yes                                           | Yes                | -1.250                          | 0.30103                   | 0.22185                         | 371.0                         | 177.5                       | 193.5                        | 345.0                              | 5.3                              | 1.5                                   |
| Successful group 48   | No                                            | Yes                | -4.250                          | 0.00000                   | 0.00000                         | 367.5                         | 213.0                       | 154.5                        | 251.5                              | 3.0                              | 0.3                                   |
| Successful group 49   | No                                            | No                 | 0.125                           | 0.00000                   | 0.00000                         | 418.0                         | 179.0                       | 239.0                        | 606.5                              | 38.5                             | 14.6                                  |
| Successful group 50   | No                                            | Yes                | 0.250                           | 0.69897                   | 0.30103                         | 429.5                         | 146.5                       | 283.0                        | 449.5                              | 19.6                             | 0.9                                   |
| Successful group 51   | No                                            | Yes                | -0.375                          | 0.09691                   | 0.00000                         | 319.0                         | 186.0                       | 133.0                        | 548.0                              | 12.4                             | 24.4                                  |
| Successful group 52   | Yes                                           | No                 | 0.125                           | 0.22185                   | 0.22185                         | 382.0                         | 145.5                       | 236.5                        | 306.5                              | 16.1                             | 3.8                                   |
| Successful group 53   | No                                            | No                 | -3.250                          | 0.00000                   | 0.00000                         | 422.5                         | 222.0                       | 200.5                        | 346.5                              | 4.2                              | 1.2                                   |
| Successful group 54   | No                                            | No                 | -0.625                          | 0.22185                   | 0.09691                         | 257.0                         | 211.5                       | 45.5                         | 217.0                              | 9.6                              | 4.2                                   |
| Successful group 55   | No                                            | Yes                | -3.500                          | 0.39794                   | 0.00000                         | 253.0                         | 133.0                       | 120.0                        | 511.0                              | 16.6                             | 11.2                                  |
| Successful group 56   | No                                            | Yes                | 0.750                           | 0.00000                   | -0.11394                        | 338.5                         | 180.0                       | 158.5                        | 369.5                              | 18.1                             | 9.4                                   |
| Successful group 57   | No                                            | Yes                | 3.375                           | 0.60206                   | 0.52288                         | 185.0                         | 135.0                       | 50.0                         | 679.0                              | 26.2                             | 38.1                                  |
| Successful group 58   | No                                            | No                 | -0.500                          | 0.00000                   | 0.00000                         | 337.0                         | 196.5                       | 140.5                        | 571.0                              | 6.8                              | 5.7                                   |
| Successful group 59   | No                                            | No                 | 1.250                           | 0.52288                   | 0.39794                         | 273.5                         | 123.5                       | 150.0                        | 336.5                              | 5.1                              | Unmeasurable                          |
| Successful group 60   | No                                            | Yes                | -1.125                          | 0.30103                   | 0.22185                         | 361.5                         | 169.0                       | 192.5                        | 388.5                              | 5.9                              | 0.1                                   |
| Successful group 61   | No                                            | Yes                | 0.875                           | 0.00000                   | 0.00000                         | 438.5                         | 148.5                       | 290.0                        | 515.0                              | 18.1                             | 14.9                                  |
| Successful group 62   | Yes                                           | Yes                | 0.375                           | 0.69897                   | 0.39794                         | 271.5                         | 191.5                       | 80.0                         | 437.0                              | 13.9                             | 8.4                                   |
| Successful group 63   | No                                            | Yes                | -1.375                          | 0.09691                   | 0.00000                         | 258.5                         | 199.0                       | 59.5                         | 634.5                              | 47.3                             | 45.7                                  |
| Successful group 64   | No                                            | Yes                | 0.375                           | 0.00000                   | 0.00000                         | 200.5                         | 162.0                       | 38.5                         | 350.0                              | 4.7                              | 0.6                                   |
